# Supplementary material for: Functional Status and Rehabilitation Barriers in Adults of Working Age After Stroke: A Cross-Sectional Study
Source: Research Square preprint supplement (doi:10.21203/rs.3.rs-8920372/v1), 2026-02-23
Supplement: Supplementary file 1 [file 3ea9aebd1ae1c91991dc9151.docx]

Table S1. Correlation matrix between functional status and rehabilitation barriers.

| **Variable 1** | **Variable 2** | **Correlation** | **Lower CI** | **Upper CI** | **P-value** | **P-value (adj.)a** |
| --- | --- | --- | --- | --- | --- | --- |
| CRBS (Access) | CRBS sumscore | 0.39 | 0.15 | 0.59 | 0.002 | 0.016 |
| CRBS (Comorbidities/Functional status) | CRBS (Access) | 0.10 | -0.16 | 0.35 | 0.448 | 0.706 |
| CRBS (Comorbidities/Functional status) | CRBS (Perceived needs) | 0.28 | 0.03 | 0.50 | 0.031 | 0.121 |
| CRBS (Comorbidities/Functional status) | CRBS (Personal/Family problems) | -0.08 | -0.33 | 0.18 | 0.538 | 0.752 |
| CRBS (Comorbidities/Functional status) | CRBS (Travel/Work conflicts) | -0.10 | -0.35 | 0.15 | 0.428 | 0.690 |
| CRBS (Comorbidities/Functional status) | CRBS sumscore | 0.59 | 0.40 | 0.74 | <0.001 | <0.001 |
| CRBS (Perceived needs) | CRBS (Access) | -0.13 | -0.38 | 0.13 | 0.316 | 0.588 |
| CRBS (Perceived needs) | CRBS (Personal/Family problems) | 0.37 | 0.12 | 0.57 | 0.004 | 0.025 |
| CRBS (Perceived needs) | CRBS (Travel/Work conflicts) | 0.05 | -0.21 | 0.30 | 0.714 | 0.844 |
| CRBS (Perceived needs) | CRBS sumscore | 0.64 | 0.45 | 0.77 | <0.001 | <0.001 |
| CRBS (Personal/Family problems) | CRBS (Access) | 0.04 | -0.21 | 0.30 | 0.735 | 0.862 |
| CRBS (Personal/Family problems) | CRBS (Travel/Work conflicts) | 0.33 | 0.08 | 0.54 | 0.011 | 0.056 |
| CRBS (Personal/Family problems) | CRBS sumscore | 0.39 | 0.14 | 0.58 | 0.003 | 0.017 |
| CRBS (Travel/Work conflicts) | CRBS (Access) | 0.14 | -0.12 | 0.39 | 0.281 | 0.562 |
| CRBS (Travel/Work conflicts) | CRBS sumscore | 0.32 | 0.07 | 0.53 | 0.014 | 0.068 |
| mBI | CRBS (Access) | -0.24 | -0.47 | 0.01 | 0.063 | 0.203 |
| mBI | CRBS (Comorbidities/Functional status) | -0.19 | -0.43 | 0.07 | 0.142 | 0.350 |
| mBI | CRBS (Perceived needs) | -0.04 | -0.29 | 0.22 | 0.753 | 0.876 |
| mBI | CRBS (Personal/Family problems) | 0.02 | -0.24 | 0.27 | 0.898 | 0.969 |
| mBI | CRBS (Travel/Work conflicts) | -0.03 | -0.28 | 0.23 | 0.850 | 0.946 |
| mBI | CRBS sumscore | -0.27 | -0.49 | -0.01 | 0.042 | 0.149 |
| mBI | SIS (ADL/IADL) | 0.48 | 0.25 | 0.65 | <0.001 | 0.001 |
| mBI | SIS (Communication) | 0.17 | -0.09 | 0.41 | 0.186 | 0.401 |
| mBI | SIS (Emotions) | -0.21 | -0.45 | 0.05 | 0.105 | 0.304 |
| mBI | SIS (Hand function) | 0.39 | 0.15 | 0.59 | 0.002 | 0.017 |
| mBI | SIS (Memory) | -0.09 | -0.34 | 0.17 | 0.484 | 0.739 |
| mBI | SIS (Mobility) | 0.57 | 0.36 | 0.72 | <0.001 | <0.001 |
| mBI | SIS (Participation) | 0.18 | -0.08 | 0.41 | 0.183 | 0.401 |
| mBI | SIS (Strength) | 0.46 | 0.23 | 0.64 | <0.001 | 0.002 |
| mRS | CRBS (Access) | 0.16 | -0.10 | 0.40 | 0.215 | 0.451 |
| mRS | CRBS (Comorbidities/Functional status) | -0.01 | -0.27 | 0.25 | 0.942 | 0.982 |
| mRS | CRBS (Perceived needs) | 0.09 | -0.17 | 0.34 | 0.508 | 0.751 |
| mRS | CRBS (Personal/Family problems) | 0.21 | -0.05 | 0.44 | 0.110 | 0.304 |
| mRS | CRBS (Travel/Work conflicts) | 0.09 | -0.17 | 0.34 | 0.500 | 0.751 |
| mRS | CRBS sumscore | 0.25 | -0.01 | 0.47 | 0.058 | 0.199 |
| mRS | mBI | -0.27 | -0.49 | -0.02 | 0.038 | 0.142 |
| mRS | SIS (ADL/IADL) | -0.13 | -0.37 | 0.13 | 0.325 | 0.589 |
| mRS | SIS (Communication) | 0.07 | -0.19 | 0.32 | 0.583 | 0.766 |
| mRS | SIS (Emotions) | 0.08 | -0.18 | 0.33 | 0.555 | 0.762 |
| mRS | SIS (Hand function) | -0.30 | -0.52 | -0.05 | 0.022 | 0.095 |
| mRS | SIS (Memory) | 0.06 | -0.20 | 0.31 | 0.667 | 0.803 |
| mRS | SIS (Mobility) | -0.26 | -0.49 | -0.01 | 0.043 | 0.151 |
| mRS | SIS (Participation) | -0.01 | -0.27 | 0.24 | 0.932 | 0.982 |
| mRS | SIS (Strength) | -0.34 | -0.55 | -0.09 | 0.009 | 0.053 |
| NIHSS | CRBS (Access) | 0.32 | 0.07 | 0.53 | 0.014 | 0.068 |
| NIHSS | CRBS (Comorbidities/Functional status) | 0.23 | -0.03 | 0.46 | 0.078 | 0.242 |
| NIHSS | CRBS (Perceived needs) | -0.13 | -0.37 | 0.13 | 0.335 | 0.591 |
| NIHSS | CRBS (Personal/Family problems) | 0.02 | -0.23 | 0.28 | 0.856 | 0.946 |
| NIHSS | CRBS (Travel/Work conflicts) | 0.03 | -0.23 | 0.28 | 0.840 | 0.944 |
| NIHSS | CRBS sumscore | 0.32 | 0.07 | 0.53 | 0.013 | 0.064 |
| NIHSS | mBI | -0.53 | -0.69 | -0.31 | <0.001 | <0.001 |
| NIHSS | mRS | 0.29 | 0.04 | 0.51 | 0.026 | 0.109 |
| NIHSS | SIS (ADL/IADL) | -0.19 | -0.42 | 0.07 | 0.149 | 0.350 |
| NIHSS | SIS (Communication) | 0.06 | -0.20 | 0.31 | 0.656 | 0.797 |
| NIHSS | SIS (Emotions) | 0.14 | -0.12 | 0.38 | 0.301 | 0.586 |
| NIHSS | SIS (Hand function) | -0.27 | -0.49 | -0.01 | 0.039 | 0.144 |
| NIHSS | SIS (Memory) | -0.14 | -0.38 | 0.12 | 0.300 | 0.586 |
| NIHSS | SIS (Mobility) | -0.46 | -0.64 | -0.23 | <0.001 | 0.002 |
| NIHSS | SIS (Participation) | -0.04 | -0.29 | 0.22 | 0.766 | 0.877 |
| NIHSS | SIS (Strength) | -0.28 | -0.50 | -0.03 | 0.031 | 0.121 |
| SIS (ADL/IADL) | CRBS (Access) | -0.13 | -0.38 | 0.13 | 0.312 | 0.588 |
| SIS (ADL/IADL) | CRBS (Comorbidities/Functional status) | 0.04 | -0.22 | 0.29 | 0.773 | 0.877 |
| SIS (ADL/IADL) | CRBS (Perceived needs) | -0.10 | -0.35 | 0.16 | 0.431 | 0.690 |
| SIS (ADL/IADL) | CRBS (Personal/Family problems) | -0.11 | -0.36 | 0.15 | 0.395 | 0.648 |
| SIS (ADL/IADL) | CRBS (Travel/Work conflicts) | -0.06 | -0.31 | 0.20 | 0.637 | 0.795 |
| SIS (ADL/IADL) | CRBS sumscore | -0.18 | -0.42 | 0.08 | 0.168 | 0.375 |
| SIS (ADL/IADL) | SIS (Communication) | 0.19 | -0.07 | 0.42 | 0.150 | 0.350 |
| SIS (ADL/IADL) | SIS (Emotions) | -0.33 | -0.54 | -0.08 | 0.010 | 0.055 |
| SIS (ADL/IADL) | SIS (Memory) | 0.12 | -0.14 | 0.36 | 0.374 | 0.627 |
| SIS (ADL/IADL) | SIS (Participation) | 0.63 | 0.44 | 0.76 | <0.001 | <0.001 |
| SIS (Communication) | CRBS (Access) | -0.17 | -0.41 | 0.09 | 0.201 | 0.428 |
| SIS (Communication) | CRBS (Comorbidities/Functional status) | 0.07 | -0.19 | 0.32 | 0.586 | 0.766 |
| SIS (Communication) | CRBS (Perceived needs) | 0.15 | -0.11 | 0.39 | 0.264 | 0.536 |
| SIS (Communication) | CRBS (Personal/Family problems) | 0.09 | -0.17 | 0.34 | 0.518 | 0.752 |
| SIS (Communication) | CRBS (Travel/Work conflicts) | -0.00 | -0.26 | 0.25 | 0.982 | 0.997 |
| SIS (Communication) | CRBS sumscore | 0.13 | -0.13 | 0.37 | 0.331 | 0.591 |
| SIS (Communication) | SIS (Emotions) | -0.08 | -0.33 | 0.18 | 0.542 | 0.752 |
| SIS (Communication) | SIS (Participation) | 0.19 | -0.07 | 0.42 | 0.157 | 0.355 |
| SIS (Emotions) | CRBS (Access) | 0.10 | -0.16 | 0.35 | 0.452 | 0.706 |
| SIS (Emotions) | CRBS (Comorbidities/Functional status) | 0.07 | -0.19 | 0.32 | 0.593 | 0.768 |
| SIS (Emotions) | CRBS (Perceived needs) | -0.02 | -0.27 | 0.24 | 0.906 | 0.970 |
| SIS (Emotions) | CRBS (Personal/Family problems) | -0.08 | -0.33 | 0.18 | 0.534 | 0.752 |
| SIS (Emotions) | CRBS (Travel/Work conflicts) | 0.14 | -0.13 | 0.38 | 0.309 | 0.588 |
| SIS (Emotions) | CRBS sumscore | 0.12 | -0.14 | 0.37 | 0.350 | 0.603 |
| SIS (Emotions) | SIS (Participation) | -0.30 | -0.52 | -0.05 | 0.021 | 0.095 |
| SIS (Hand function) | CRBS (Access) | -0.19 | -0.42 | 0.07 | 0.151 | 0.350 |
| SIS (Hand function) | CRBS (Comorbidities/Functional status) | -0.00 | -0.26 | 0.26 | 0.992 | 0.997 |
| SIS (Hand function) | CRBS (Perceived needs) | -0.00 | -0.26 | 0.26 | 0.997 | 0.997 |
| SIS (Hand function) | CRBS (Personal/Family problems) | -0.10 | -0.35 | 0.16 | 0.457 | 0.706 |
| SIS (Hand function) | CRBS (Travel/Work conflicts) | 0.02 | -0.24 | 0.27 | 0.893 | 0.969 |
| SIS (Hand function) | CRBS sumscore | -0.12 | -0.36 | 0.14 | 0.375 | 0.627 |
| SIS (Hand function) | SIS (ADL/IADL) | 0.72 | 0.57 | 0.82 | <0.001 | <0.001 |
| SIS (Hand function) | SIS (Communication) | 0.06 | -0.20 | 0.31 | 0.655 | 0.797 |
| SIS (Hand function) | SIS (Emotions) | -0.19 | -0.43 | 0.07 | 0.145 | 0.350 |
| SIS (Hand function) | SIS (Memory) | 0.01 | -0.24 | 0.27 | 0.919 | 0.976 |
| SIS (Hand function) | SIS (Mobility) | 0.67 | 0.49 | 0.79 | <0.001 | <0.001 |
| SIS (Hand function) | SIS (Participation) | 0.43 | 0.19 | 0.61 | <0.001 | 0.006 |
| SIS (Memory) | CRBS (Access) | -0.05 | -0.30 | 0.21 | 0.698 | 0.833 |
| SIS (Memory) | CRBS (Comorbidities/Functional status) | -0.01 | -0.26 | 0.25 | 0.961 | 0.990 |
| SIS (Memory) | CRBS (Perceived needs) | 0.07 | -0.19 | 0.32 | 0.578 | 0.766 |
| SIS (Memory) | CRBS (Personal/Family problems) | 0.22 | -0.04 | 0.45 | 0.097 | 0.290 |
| SIS (Memory) | CRBS (Travel/Work conflicts) | 0.07 | -0.19 | 0.32 | 0.579 | 0.766 |
| SIS (Memory) | CRBS sumscore | 0.13 | -0.13 | 0.38 | 0.322 | 0.589 |
| SIS (Memory) | SIS (Communication) | 0.38 | 0.14 | 0.58 | 0.003 | 0.019 |
| SIS (Memory) | SIS (Emotions) | -0.09 | -0.34 | 0.17 | 0.508 | 0.751 |
| SIS (Memory) | SIS (Participation) | 0.34 | 0.09 | 0.55 | 0.008 | 0.047 |
| SIS (Mobility) | CRBS (Access) | -0.21 | -0.44 | 0.05 | 0.109 | 0.304 |
| SIS (Mobility) | CRBS (Comorbidities/Functional status) | 0.06 | -0.20 | 0.31 | 0.652 | 0.797 |
| SIS (Mobility) | CRBS (Perceived needs) | 0.02 | -0.24 | 0.27 | 0.889 | 0.969 |
| SIS (Mobility) | CRBS (Personal/Family problems) | -0.15 | -0.39 | 0.11 | 0.249 | 0.513 |
| SIS (Mobility) | CRBS (Travel/Work conflicts) | -0.08 | -0.33 | 0.18 | 0.542 | 0.752 |
| SIS (Mobility) | CRBS sumscore | -0.19 | -0.43 | 0.07 | 0.142 | 0.350 |
| SIS (Mobility) | SIS (ADL/IADL) | 0.83 | 0.73 | 0.90 | <0.001 | <0.001 |
| SIS (Mobility) | SIS (Communication) | 0.24 | -0.01 | 0.47 | 0.062 | 0.203 |
| SIS (Mobility) | SIS (Emotions) | -0.29 | -0.51 | -0.04 | 0.027 | 0.109 |
| SIS (Mobility) | SIS (Memory) | 0.19 | -0.07 | 0.43 | 0.145 | 0.350 |
| SIS (Mobility) | SIS (Participation) | 0.56 | 0.36 | 0.71 | <0.001 | <0.001 |
| SIS (Participation) | CRBS (Access) | -0.07 | -0.32 | 0.19 | 0.599 | 0.769 |
| SIS (Participation) | CRBS (Comorbidities/Functional status) | 0.01 | -0.25 | 0.26 | 0.946 | 0.982 |
| SIS (Participation) | CRBS (Perceived needs) | 0.12 | -0.14 | 0.37 | 0.347 | 0.603 |
| SIS (Participation) | CRBS (Personal/Family problems) | 0.07 | -0.20 | 0.32 | 0.626 | 0.795 |
| SIS (Participation) | CRBS (Travel/Work conflicts) | 0.07 | -0.19 | 0.32 | 0.582 | 0.766 |
| SIS (Participation) | CRBS sumscore | -0.00 | -0.26 | 0.26 | 0.997 | 0.997 |
| SIS (Strength) | CRBS (Access) | -0.20 | -0.43 | 0.06 | 0.133 | 0.350 |
| SIS (Strength) | CRBS (Comorbidities/Functional status) | 0.08 | -0.18 | 0.33 | 0.530 | 0.752 |
| SIS (Strength) | CRBS (Perceived needs) | -0.12 | -0.36 | 0.14 | 0.378 | 0.627 |
| SIS (Strength) | CRBS (Personal/Family problems) | -0.20 | -0.43 | 0.06 | 0.136 | 0.350 |
| SIS (Strength) | CRBS (Travel/Work conflicts) | -0.06 | -0.31 | 0.20 | 0.637 | 0.795 |
| SIS (Strength) | CRBS sumscore | -0.24 | -0.47 | 0.02 | 0.069 | 0.219 |
| SIS (Strength) | SIS (ADL/IADL) | 0.66 | 0.48 | 0.78 | <0.001 | <0.001 |
| SIS (Strength) | SIS (Communication) | 0.22 | -0.04 | 0.45 | 0.098 | 0.290 |
| SIS (Strength) | SIS (Emotions) | -0.19 | -0.42 | 0.07 | 0.152 | 0.350 |
| SIS (Strength) | SIS (Hand function) | 0.69 | 0.53 | 0.80 | <0.001 | <0.001 |
| SIS (Strength) | SIS (Memory) | 0.04 | -0.22 | 0.29 | 0.774 | 0.877 |
| SIS (Strength) | SIS (Mobility) | 0.73 | 0.58 | 0.83 | <0.001 | <0.001 |
| SIS (Strength) | SIS (Participation) | 0.52 | 0.30 | 0.68 | <0.001 | <0.001 |
| aP-values adjusted using the false discovery rate method. | | | | | | |
| Abbreviations: CI, confidence interval; NIHSS, National Institutes of Health Stroke Scale; mRS, modified Rankin Scale; mBI, modified Barthel Index; SIS, Stroke Impact Scale; CRBS, Cardiac Rehabilitation Barriers Scale. | | | | | | |
